# Supplementary material for: Zinc Competition among the Intestinal Microbiota
Source: PubMed Central journal article supplement — mBio. 2012 Jul 31;3(4):e00171-12. doi: 10.1128/mBio.00171-12 (PMC3419517; doi:10.1128/mbio.00171-12), 2012-07-31

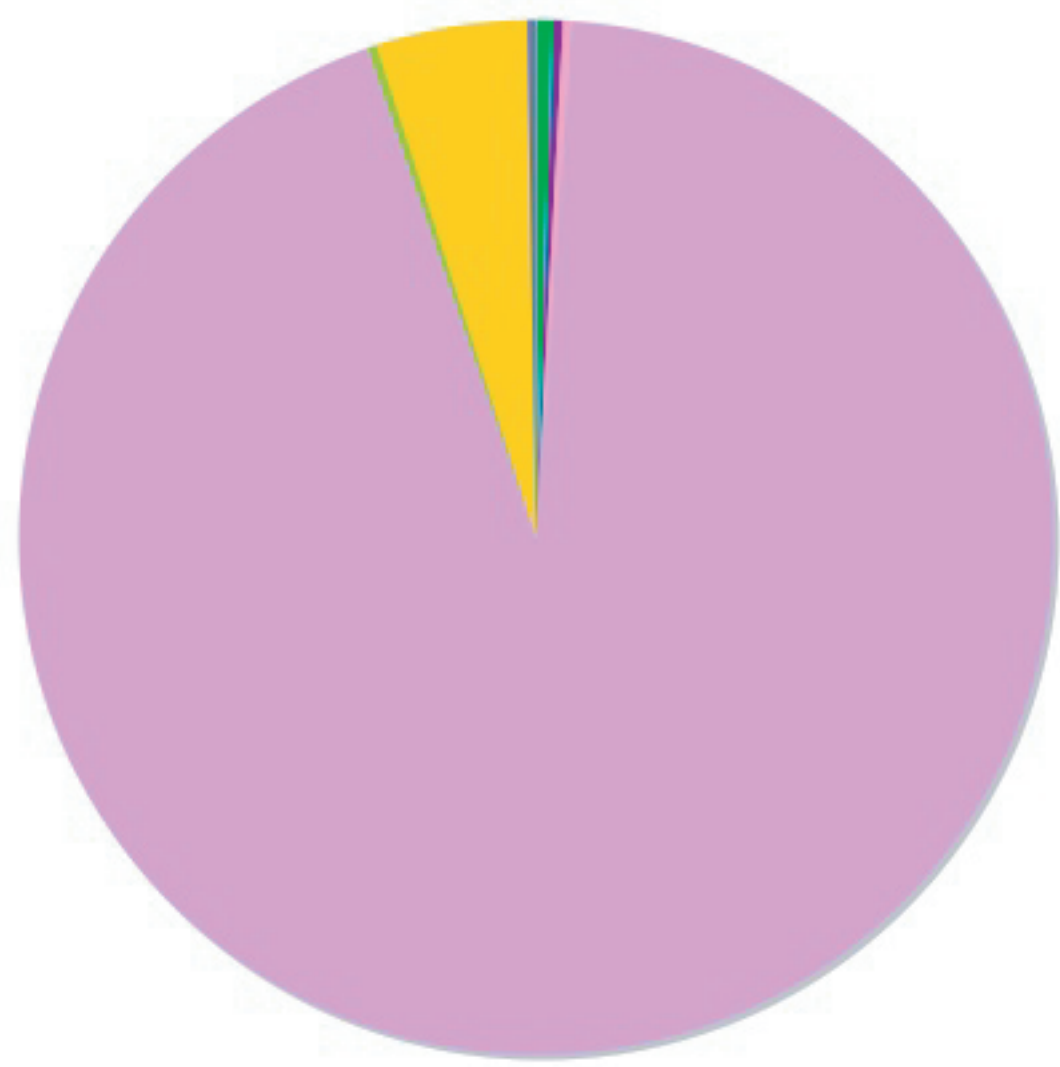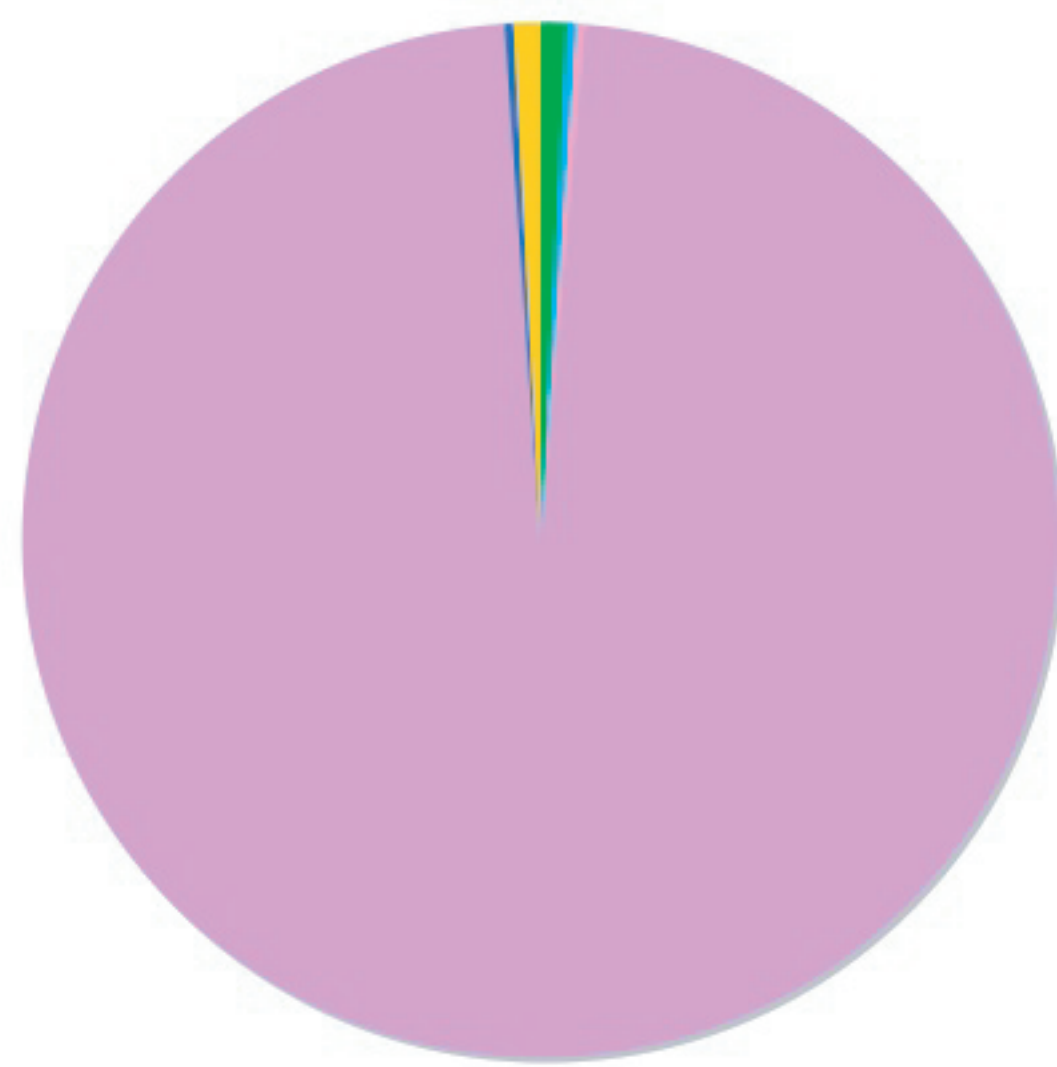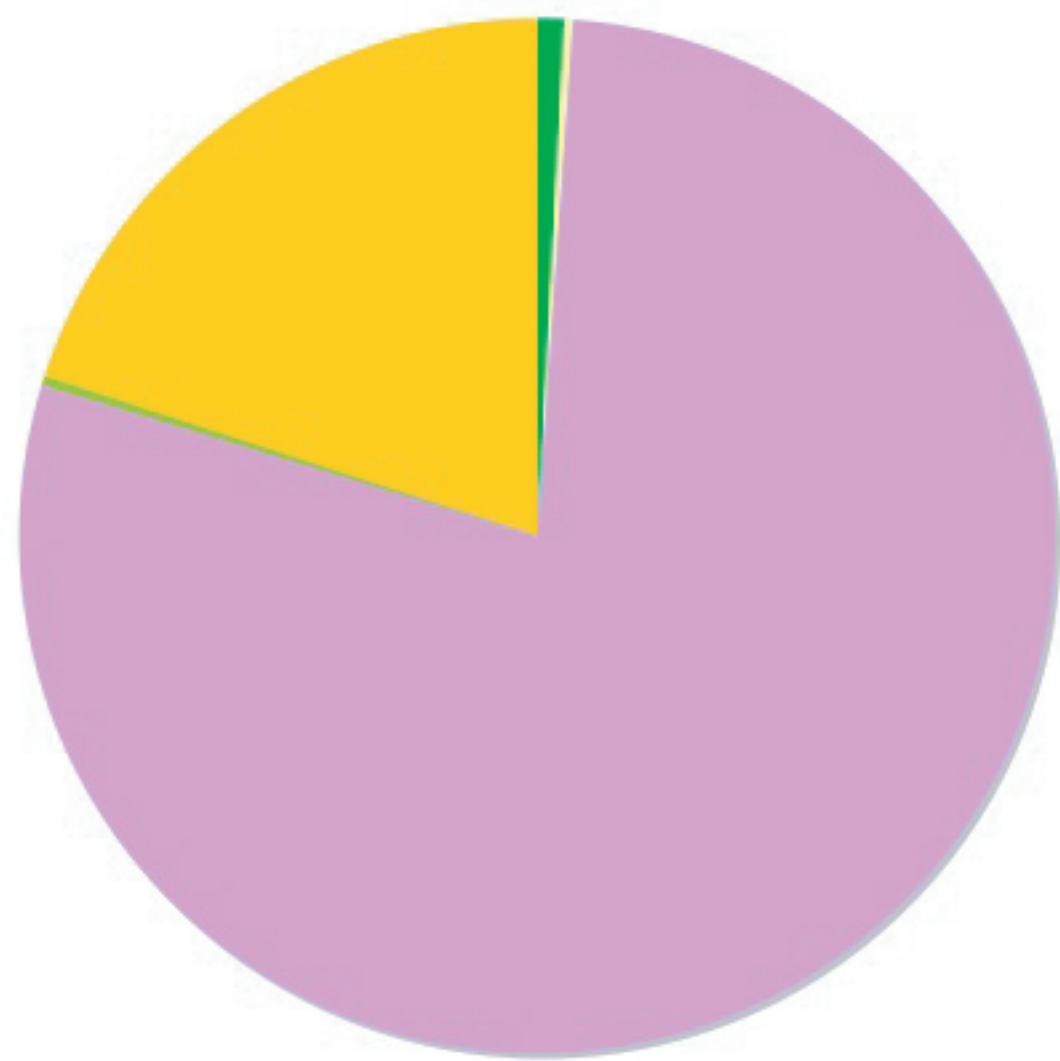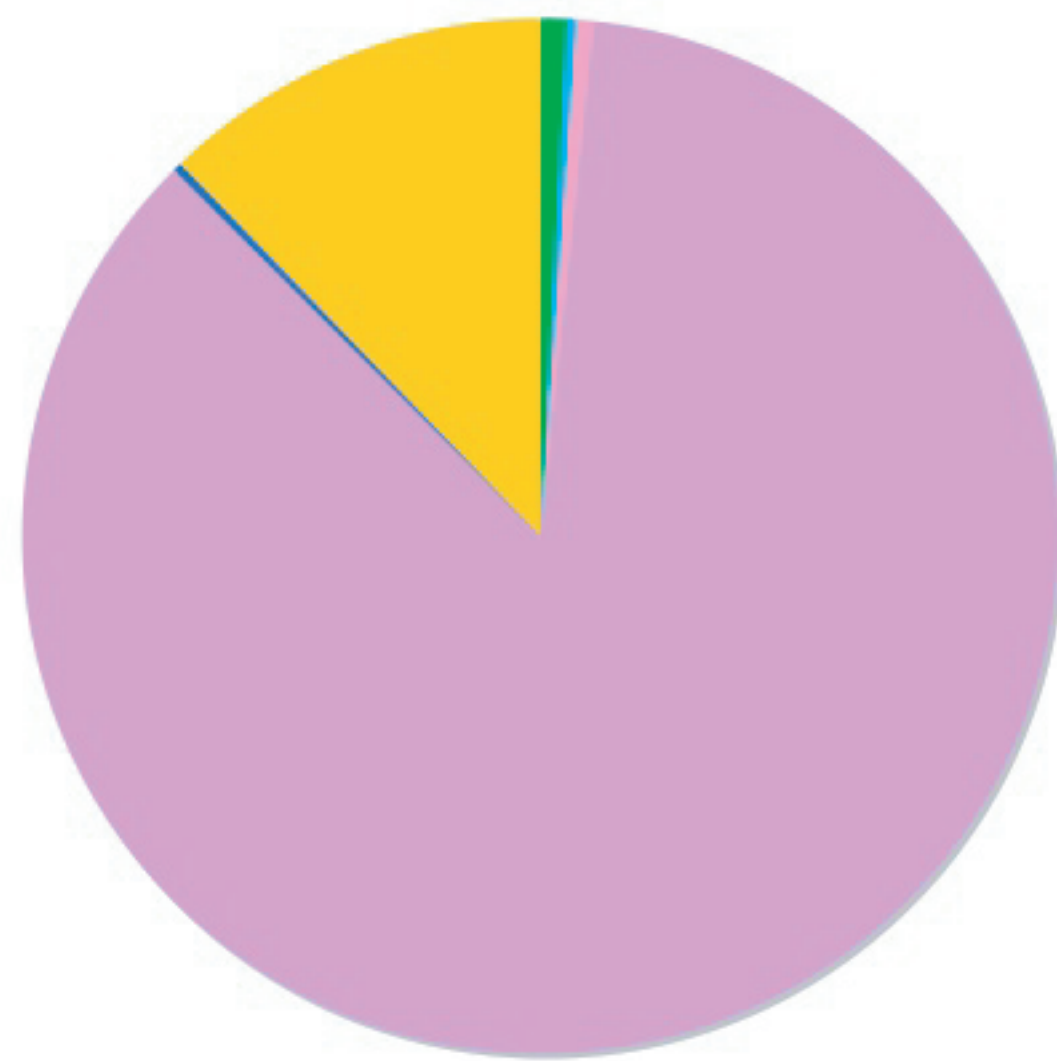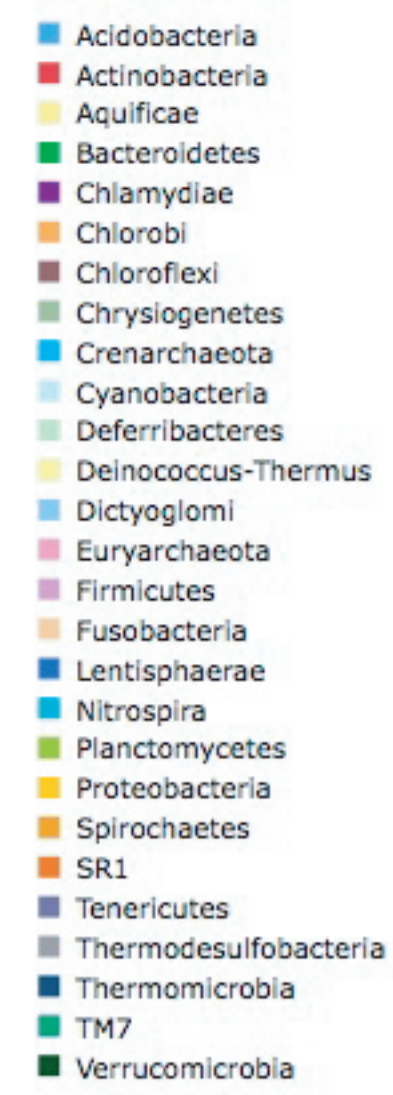

|                              | Conventional | Conventional 2 | Limited Flora 1 | Limited Flora 2 |
|------------------------------|--------------|----------------|-----------------|-----------------|
| <b>Acidobacteria</b>         | 0.0000       | 0.0000         | 0.0000          | 0.0000          |
| <b>Actinobacteria</b>        | 0.0440       | 0.0368         | 0.0293          | 0.1243          |
| <b>Aquificae</b>             | 0.0527       | 0.0368         | 0.0293          | 0.0000          |
| <b>Bacteroidetes</b>         | 0.5626       | 0.6804         | 0.7847          | 0.5777          |
| <b>Chlamydiae</b>            | 0.0352       | 0.0368         | 0.0147          | 0.0073          |
| <b>Chlorobi</b>              | 0.0088       | 0.0184         | 0.0000          | 0.0146          |
| <b>Chloroflexi</b>           | 0.0088       | 0.0000         | 0.0073          | 0.0073          |
| <b>Chrysiogenetes</b>        | 0.0000       | 0.0184         | 0.0000          | 0.0000          |
| <b>Crenarchaeota</b>         | 0.1494       | 0.1839         | 0.0953          | 0.2779          |
| <b>Cyanobacteria</b>         | 0.0264       | 0.0184         | 0.0000          | 0.0000          |
| <b>Deferribacteres</b>       | 0.0000       | 0.0000         | 0.0000          | 0.0512          |
| <b>Deinococcus-Thermus</b>   | 0.0352       | 0.1287         | 0.0587          | 0.0804          |
| <b>Dictyoglomi</b>           | 0.0176       | 0.0000         | 0.0000          | 0.0000          |
| <b>Euryarchaeota</b>         | 0.2989       | 0.0919         | 0.0513          | 0.5119          |
| <b>Firmicutes</b>            | 93.4951      | 97.6830        | 78.7768         | 85.9588         |
| <b>Fusobacteria</b>          | 0.0527       | 0.0184         | 0.0000          | 0.0073          |
| <b>Lentisphaerae</b>         | 0.0615       | 0.1103         | 0.0000          | 0.0293          |
| <b>Nitrospira</b>            | 0.0000       | 0.0000         | 0.0000          | 0.0000          |
| <b>Planctomycetes</b>        | 0.0967       | 0.0552         | 0.0513          | 0.0731          |
| <b>Proteobacteria</b>        | 4.8875       | 0.8275         | 20.0645         | 12.1837         |
| <b>Spirochaetes</b>          | 0.0088       | 0.0000         | 0.0073          | 0.0000          |
| <b>SR1</b>                   | 0.0000       | 0.0000         | 0.0000          | 0.0000          |
| <b>Tenericutes</b>           | 0.0791       | 0.0368         | 0.0000          | 0.0512          |
| <b>Thermodesulfobacteria</b> | 0.0000       | 0.0000         | 0.0000          | 0.0000          |
| <b>Thermomicrobia</b>        | 0.0000       | 0.0000         | 0.0073          | 0.0146          |
| <b>TM7</b>                   | 0.0000       | 0.0000         | 0.0073          | 0.0000          |
| <b>Verrucomicrobia</b>       | 0.0791       | 0.0184         | 0.0147          | 0.0293          |

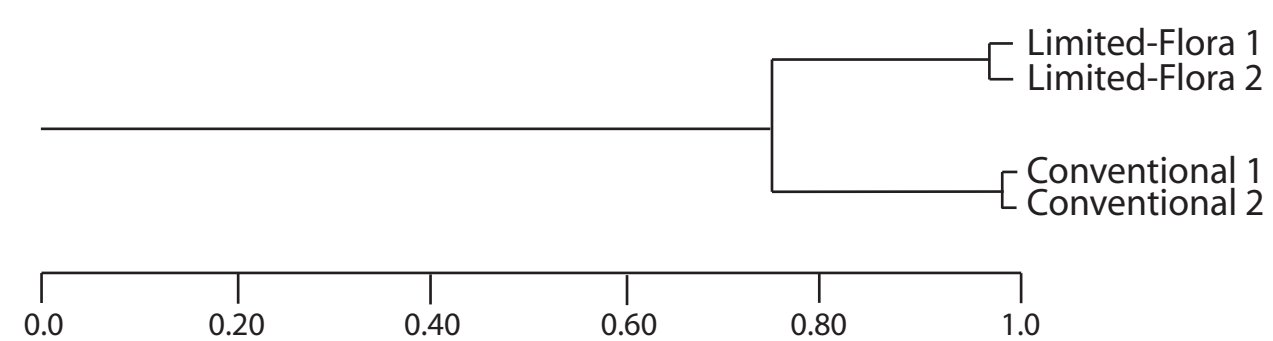

Supplement: mbo004121299sf03.pdf [file mbo004121299sf03.pdf]
