# Supplementary material for: Zinc Competition among the Intestinal Microbiota
Source: PubMed Central journal article supplement — mBio. 2012 Jul 31;3(4):e00171-12. doi: 10.1128/mBio.00171-12 (PMC3419517; doi:10.1128/mbio.00171-12), 2012-07-31

Conventional HhaI Digest

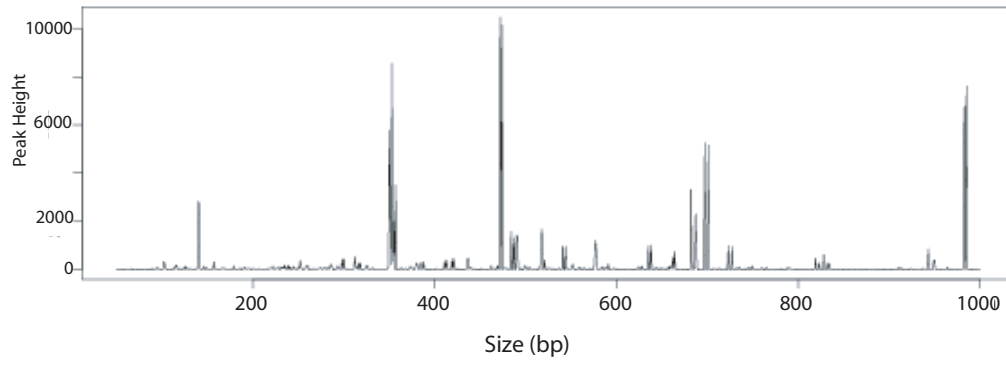

Limited Flora HhaI Digest

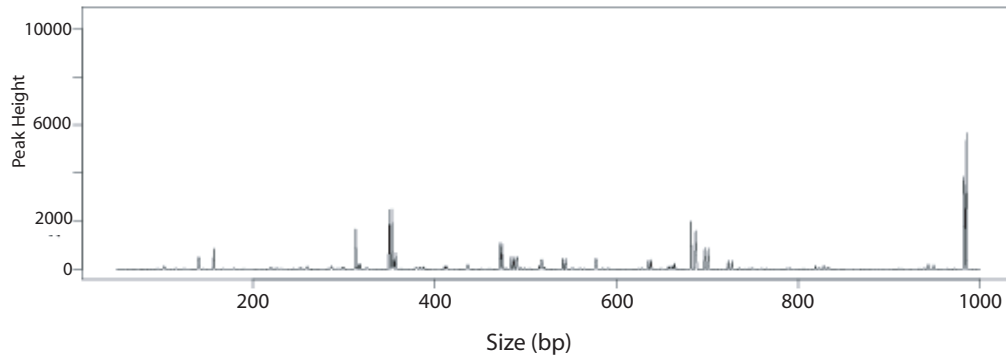

Conventional MspI Digest

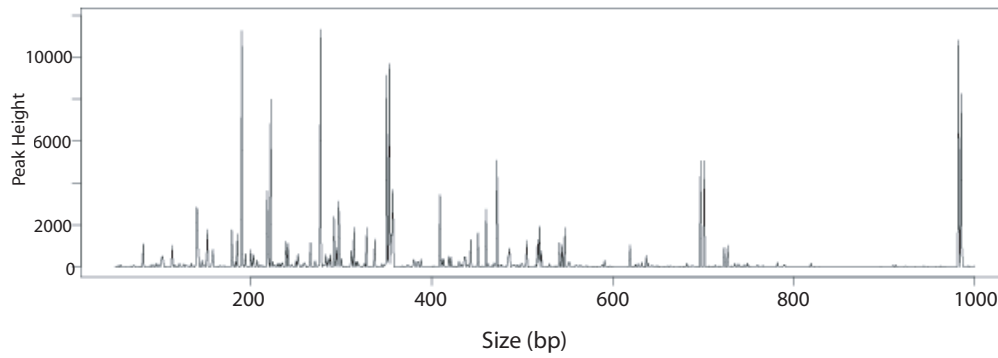

Limited Flora MspI Digest

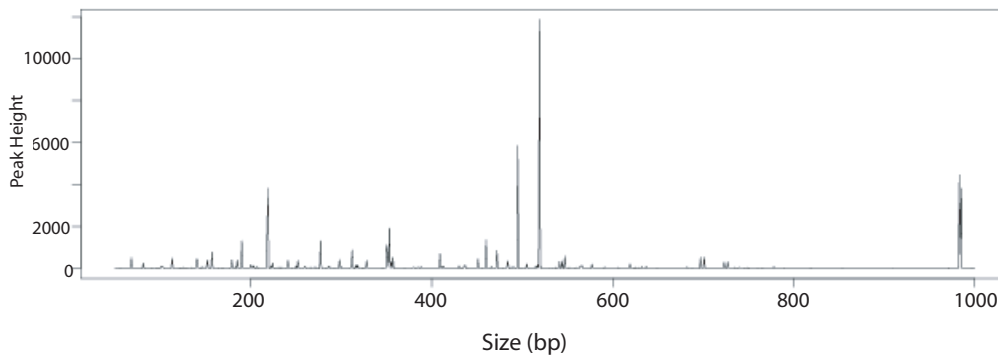

Supplement: mbo004121299sf01.pdf [file mbo004121299sf01.pdf]
